# Supplementary material for: Association of Vaginal Estradiol Tablet With Serum Estrogen Levels in Women Who Are Postmenopausal: Secondary Analysis of a Randomized Clinical Trial
Source: PubMed Central journal article supplement (PMC9664265; doi:10.1001/jamanetworkopen.2022.41743), 2022-11-14

## Supplementary Online Content

Mitchell CM, Larson JC, Crandall CJ, et al. Association of vaginal estradiol tablet with serum estrogen levels in women who are postmenopausal: secondary analysis of a randomized clinical trial. *JAMA Netw Open*. 2022;5(11):e2241743. doi:10.1001/jamanetworkopen.2022.41743

**eTable 1.** Associations Between Baseline Participant Characteristics and Week 12 Estrone Concentration

**eTable 2.** Associations Between Baseline Participant Characteristics and Week 12 SHBG Concentration

**eFigure 1.** CONSORT Diagram of How Original Trial Participants Were Enrolled and How This Subset Was Selected

**eFigure 2.** Serum Concentrations of Estrone at Enrollment and 12 Weeks for Participants in the MsFLASH Vaginal Health Randomized Trial Assigned to the Vaginal 10 µg Estradiol Tablet + Placebo Gel (n = 88) or Dual Placebo (n = 86) Arms

**eFigure 3.** Serum Concentrations of Sex Hormone-Binding Globulin (SHBG) at Enrollment and 12 Weeks for Participants in the MsFLASH Vaginal Health Randomized Trial Assigned to the Vaginal 10 µg Estradiol Tablet + Placebo Gel (n = 88) or Dual Placebo (n = 86) Arms

This supplementary material has been provided by the authors to give readers additional information about their work.

**eTable 1.** Associations between baseline participant characteristics and week 12 Estrone concentration

| Characteristic                                | N (%) <sup>a</sup> | Week 12 Estrone<br>(pg/mL): | p-value <sup>b</sup> |
|-----------------------------------------------|--------------------|-----------------------------|----------------------|
|                                               |                    | Geometric Mean (SD)         |                      |
| Treatment group                               |                    |                             | 0.78                 |
| Vaginal estrogen                              | 88 (51)            | 11.8 (5.9)                  |                      |
| Placebo                                       | 86 (49)            | 11.5 (6.3)                  |                      |
| Study pill adherence, %                       |                    |                             | 0.21                 |
| < 80                                          | 22 (13)            | 10.2 (4.7)                  |                      |
| ≥ 80                                          | 152 (87)           | 11.9 (6.3)                  |                      |
| Age, years                                    |                    |                             | 0.29                 |
| < 60                                          | 72 (41)            | 12.3 (5.9)                  |                      |
| ≥ 60                                          | 102 (59)           | 11.2 (6.2)                  |                      |
| Time since menopause, years                   |                    |                             | 0.12                 |
| < 5                                           | 25 (14)            | 13.5 (7.5)                  |                      |
| ≥ 5                                           | 147 (85)           | 11.3 (5.8)                  |                      |
| Body Mass Index, kg/m <sup>2</sup>            |                    |                             | 0.001                |
| < 25                                          | 82 (47)            | 10.2 (5.6)                  |                      |
| ≥ 25                                          | 92 (53)            | 13.1 (6.1)                  |                      |
| Estradiol concentration                       |                    |                             | 0.002                |
| < median (3.5 pg/mL)                          | 87 (50)            | 10.3 (5.3)                  |                      |
| ≥ median                                      | 87 (50)            | 13.2 (6.6)                  |                      |
| Estrone concentration                         |                    |                             | <0.001               |
| < median (10.5 pg/mL)                         | 87 (50)            | 8.8 (4.1)                   |                      |
| ≥ median                                      | 87 (50)            | 15.5 (6.3)                  |                      |
| SHBG concentration                            |                    |                             | 0.27                 |
| < median (59.3 nmol/L)                        | 87 (50)            | 12.2 (5.9)                  |                      |
| ≥ median                                      | 87 (50)            | 11.2 (6.2)                  |                      |
| Race                                          |                    |                             | 0.01                 |
| African American                              | 8 (5)              | 20.0 (8.5)                  |                      |
| Other or unknown                              | 14 (8)             | 10.9 (5.0)                  |                      |
| White                                         | 152 (87)           | 11.4 (5.9)                  |                      |
| Sexually Active                               |                    |                             | 0.79                 |
| Yes                                           | 143 (82)           | 11.7 (6.0)                  |                      |
| No                                            | 30 (17)            | 11.4 (6.4)                  |                      |
| Most Bothersome Symptom                       |                    |                             | 0.26                 |
| Pain with vaginal penetration                 | 97 (56)            | 11.3 (5.4)                  |                      |
| Vaginal dryness                               | 38 (22)            | 11.5 (6.8)                  |                      |
| Vulvar / vaginal itching                      | 15 (9)             | 15.2 (6.3)                  |                      |
| Vulvar / vaginal irritation                   | 13 (8)             | 11.7 (6.6)                  |                      |
| Vulvar / vaginal soreness                     | 7 (4)              | 14.3 (8.1)                  |                      |
| pH                                            |                    |                             | 0.20                 |
| ≤ 5                                           | 22 (13)            | 13.3 (6.6)                  |                      |
| > 5                                           | 151 (87)           | 11.4 (6.0)                  |                      |
| Vaginal Maturation Index, % superficial cells |                    |                             | 0.08                 |
| ≤ 5                                           | 143 (82)           | 11.5 (6.1)                  |                      |
| > 5                                           | 11 (6)             | 15.4 (8.9)                  |                      |

|                        |          |            |      |
|------------------------|----------|------------|------|
| MENQOL total           |          |            | 0.27 |
| < median (< 3.16)      | 83 (48)  | 11.1 (5.3) |      |
| ≥ median               | 84 (48)  | 12.1 (6.9) |      |
| PHQ-8 depression       |          |            | 0.27 |
| No symptoms (< 5)      | 121 (70) | 11.3 (5.4) |      |
| Mild or worse symptoms | 52 (30)  | 12.5 (7.7) |      |
| GAD-7 anxiety          |          |            | 0.30 |
| No symptoms (< 5)      | 108 (62) | 11.3 (5.6) |      |
| Mild or worse symptoms | 65 (37)  | 12.3 (7.0) |      |
| ISI insomnia           |          |            | 0.18 |
| No symptoms (< 8)      | 92 (53)  | 11.1 (5.2) |      |
| Mild or worse symptoms | 81 (47)  | 12.4 (7.1) |      |

<sup>a</sup>Percentages may not add up to 100% due to missing characteristic data

<sup>b</sup>p-value from an ANOVA model of log-transformed week 12 Estrone by category of participant characteristic

**eTable 2.** Associations between baseline participant characteristics and week 12 SHBG concentration

| Characteristic                                | N (%) <sup>a</sup> | Week 12 SHBG<br>(nmol/L): | p-value <sup>b</sup> |
|-----------------------------------------------|--------------------|---------------------------|----------------------|
|                                               |                    | Geometric Mean (SD)       |                      |
| Treatment group                               |                    |                           | 0.48                 |
| Vaginal estrogen                              | 88 (51)            | 56.7 (26.8)               |                      |
| Placebo                                       | 86 (49)            | 52.9 (42.1)               |                      |
| Study pill adherence, %                       |                    |                           | 0.93                 |
| < 80                                          | 22 (13)            | 54.2 (36.7)               |                      |
| ≥ 80                                          | 152 (87)           | 54.9 (35.7)               |                      |
| Age, years                                    |                    |                           | 0.03                 |
| < 60                                          | 72 (41)            | 62.4 (25.8)               |                      |
| ≥ 60                                          | 102 (59)           | 50.0 (38.3)               |                      |
| Time since menopause, years                   |                    |                           | 0.41                 |
| < 5                                           | 25 (14)            | 60.4 (19.1)               |                      |
| ≥ 5                                           | 147 (85)           | 53.7 (37.3)               |                      |
| Body Mass Index, kg/m <sup>2</sup>            |                    |                           | <0.001               |
| < 25                                          | 82 (47)            | 68.5 (25.1)               |                      |
| ≥ 25                                          | 92 (53)            | 45.0 (34.9)               |                      |
| Estradiol concentration                       |                    |                           | 0.18                 |
| < median (3.5 pg/mL)                          | 87 (50)            | 58.5 (45.4)               |                      |
| ≥ median                                      | 87 (50)            | 51.3 (25.4)               |                      |
| Estrone concentration                         |                    |                           | 0.72                 |
| < median (10.5 pg/mL)                         | 87 (50)            | 55.8 (44.9)               |                      |
| ≥ median                                      | 87 (50)            | 53.8 (24.5)               |                      |
| SHBG concentration                            |                    |                           | <0.001               |
| < median (59.3 nmol/L)                        | 87 (50)            | 37.8 (26.9)               |                      |
| ≥ median                                      | 87 (50)            | 79.5 (20.7)               |                      |
| Race                                          |                    |                           | 0.83                 |
| African American                              | 8 (5)              | 62.2 (27.3)               |                      |
| Other or unknown                              | 14 (8)             | 56.7 (18.5)               |                      |
| White                                         | 152 (87)           | 54.3 (37.1)               |                      |
| Sexually Active                               |                    |                           | 0.36                 |
| Yes                                           | 143 (82)           | 55.9 (25.8)               |                      |
| No                                            | 30 (17)            | 49.6 (60.4)               |                      |
| Most Bothersome Symptom                       |                    |                           | 0.33                 |
| Pain with vaginal penetration                 | 97 (56)            | 55.1 (24.0)               |                      |
| Vaginal dryness                               | 38 (22)            | 59.9 (26.4)               |                      |
| Vulvar / vaginal itching                      | 15 (9)             | 49.1 (28.9)               |                      |
| Vulvar / vaginal irritation                   | 13 (8)             | 39.6 (71.7)               |                      |
| Vulvar / vaginal soreness                     | 7 (4)              | 63.3 (27.3)               |                      |
| pH                                            |                    |                           | 0.91                 |
| ≤ 5                                           | 22 (13)            | 55.5 (27.6)               |                      |
| > 5                                           | 151 (87)           | 54.6 (36.8)               |                      |
| Vaginal Maturation Index, % superficial cells |                    |                           | 0.65                 |
| ≤ 5                                           | 143 (82)           | 54.0 (37.3)               |                      |
| > 5                                           | 11 (6)             | 49.0 (26.9)               |                      |

|                        |          |             |      |
|------------------------|----------|-------------|------|
| MENQOL total           |          |             | 0.18 |
| < median (< 3.16)      | 83 (48)  | 51.6 (41.6) |      |
| ≥ median               | 84 (48)  | 59.0 (25.4) |      |
| PHQ-8 depression       |          |             | 0.85 |
| No symptoms (< 5)      | 121 (70) | 55.1 (26.1) |      |
| Mild or worse symptoms | 52 (30)  | 54.0 (51.6) |      |
| GAD-7 anxiety          |          |             | 0.87 |
| No symptoms (< 5)      | 108 (62) | 55.1 (27.1) |      |
| Mild or worse symptoms | 65 (37)  | 54.2 (46.8) |      |
| ISI insomnia           |          |             | 0.82 |
| No symptoms (< 8)      | 92 (53)  | 55.4 (26.6) |      |
| Mild or worse symptoms | 81 (47)  | 54.1 (43.8) |      |

<sup>a</sup>Percentages may not add up to 100% due to missing characteristic data

<sup>b</sup>p-value from an ANOVA model of log-transformed week 12 SHBG by category of participant characteristic

eFigure 1: CONSORT diagram of how original trial participants were enrolled and how this subset was selected.

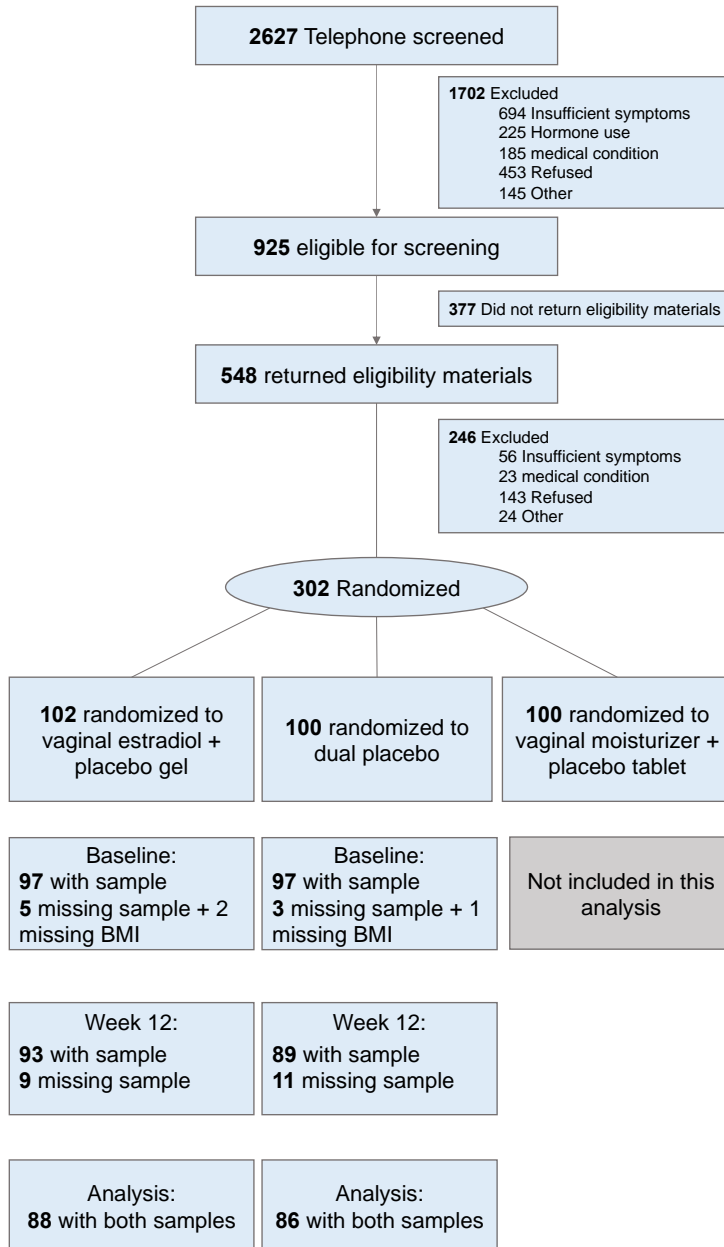

eFigure 2: Serum concentrations of estrone at enrollment and 12 weeks for participants in the MsFLASH Vaginal Health randomized trial assigned to the vaginal 10 µg estradiol tablet + placebo gel (n = 88) or dual placebo (n = 86) arms. Each triangle represents a measurement from an individual participant, and the lines connect the pre-treatment and week 12 values for each participant.

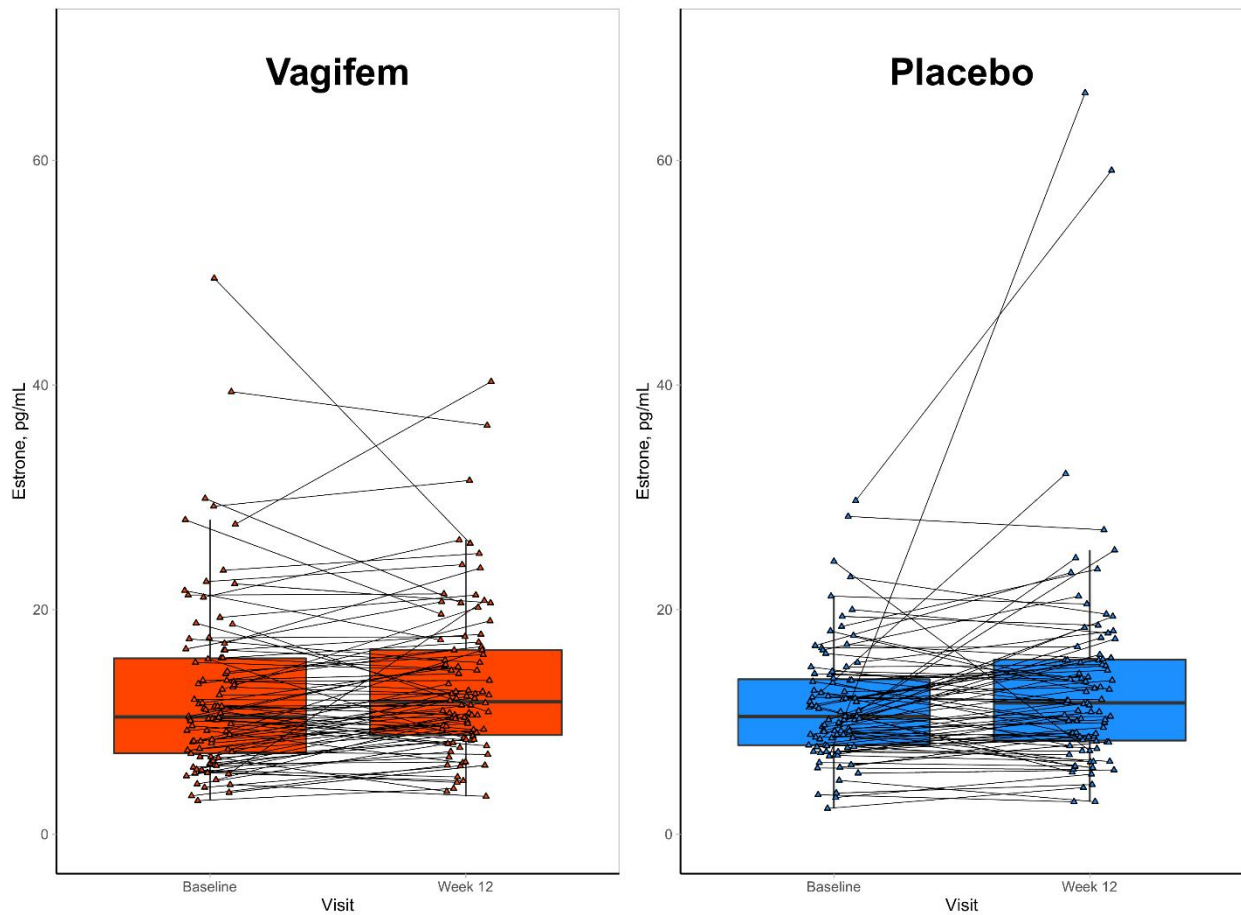

eFigure 3: Serum concentrations of sex hormone binding globulin (SHBG) at enrollment and 12 weeks for participants in the MsFLASH Vaginal Health randomized trial assigned to the vaginal 10 µg estradiol tablet + placebo gel (n = 88) or dual placebo (n = 86) arms. Each triangle represents a measurement from an individual participant, and the lines connect the pre-treatment and week 12 values for each participant.

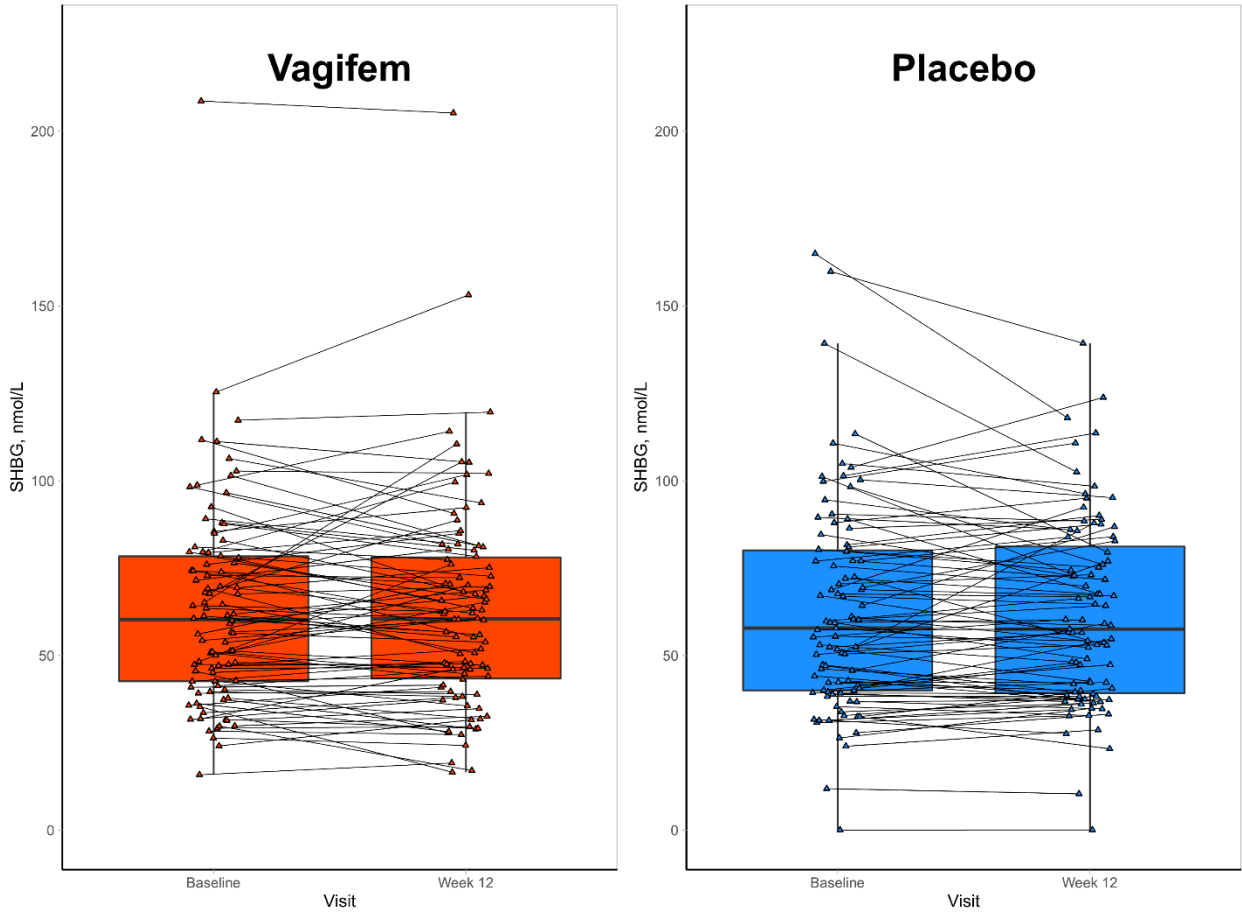

Supplement: jamanetwopen-e2241743-s002.pdf [file jamanetwopen-e2241743-s002.pdf]
